# Supplementary material for: Difference for SO2 and CO2 in TGML ionic liquids: a theoretical investigation
Source: Royal Society of Chemistry journal article supplement (doi:10.1039/b806747c), 2008-01-01
Supplement: b806747c.pdf [file b806747c.pdf]

## Supporting Information

# **Difference for SO<sub>2</sub> and CO<sub>2</sub> in TMGL Ionic Liquids: A Theoretical Investigation**

*Yong Wang, Congmin Wang, Liqun Zhang, and Haoran Li\**

Department of Chemistry, Zhejiang University, Hangzhou 310027, P. R. China.

### **Cartesian Coordinates**

---

\* Corresponding Author. Fax: +86-571-8795-1895

E-mail: [lihr@zju.edu.cn](mailto:lihr@zju.edu.cn).

### 1) TMG

|     |           |           |           |
|-----|-----------|-----------|-----------|
| C 0 | 1.172183  | -1.841275 | 0.284262  |
| N 0 | 1.172183  | -0.369073 | 0.284262  |
| C 0 | 2.502186  | 0.258680  | 0.284262  |
| C 0 | -1.339793 | -0.869977 | -1.128618 |
| N 0 | -1.154788 | -0.078338 | 0.098761  |
| C 0 | -2.392247 | 0.426355  | 0.712737  |
| C 0 | 0.055684  | 0.351264  | 0.503241  |
| N 0 | 0.152399  | 1.534764  | 1.144900  |
| H 0 | 0.201371  | -2.221713 | 0.597291  |
| H 0 | 1.924479  | -2.185886 | 0.999879  |
| H 0 | 1.421864  | -2.236932 | -0.704493 |
| H 0 | 2.435218  | 1.292683  | -0.056242 |
| H 0 | 3.138775  | -0.290116 | -0.413118 |
| H 0 | 2.967550  | 0.219926  | 1.276768  |
| H 0 | -0.405432 | -0.935568 | -1.683473 |
| H 0 | -2.078915 | -0.364134 | -1.756820 |
| H 0 | -1.703993 | -1.875685 | -0.899636 |
| H 0 | -2.219226 | 0.690069  | 1.756820  |
| H 0 | -3.138775 | -0.370158 | 0.680737  |
| H 0 | -2.790082 | 1.291450  | 0.168247  |
| H 0 | -0.567188 | 2.236932  | 1.061394  |
| H 0 | 0.947148  | 1.752294  | 1.727029  |

HF=-363.033168

### 2) LAC

|     |           |           |           |
|-----|-----------|-----------|-----------|
| C 0 | 0.319838  | -1.235191 | 0.534890  |
| C 0 | 0.319838  | 0.294865  | 0.534890  |
| O 0 | 1.657430  | 0.796644  | 0.534890  |
| C 0 | -0.449889 | 0.880247  | -0.698435 |
| O 0 | -1.657430 | 0.566944  | -0.816143 |
| O 0 | 0.262722  | 1.622969  | -1.442019 |
| H 0 | -0.708921 | -1.608960 | 0.543166  |
| H 0 | 0.855653  | -1.622969 | 1.411253  |
| H 0 | 0.822346  | -1.611144 | -0.364668 |
| H 0 | -0.195777 | 0.649893  | 1.442019  |
| H 0 | 1.635674  | 1.347475  | -0.285836 |

HF= -343.1028678

### 3) SO<sub>2</sub>

|   |   |           |           |          |
|---|---|-----------|-----------|----------|
| S | 0 | 0.642830  | -0.380984 | 0.000000 |
| O | 0 | 0.642830  | 1.084640  | 0.000000 |
| O | 0 | -0.642830 | -1.084640 | 0.000000 |

HF= -548.5993578

### 4)CO<sub>2</sub>

|   |   |          |           |          |
|---|---|----------|-----------|----------|
| C | 0 | 0.000000 | 0.000000  | 0.000000 |
| O | 0 | 0.000000 | 1.169378  | 0.000000 |
| O | 0 | 0.000000 | -1.169378 | 0.000000 |

HF= -188.5903926

### 5) TMG-CO<sub>2</sub>(B3LYP/6-31++G\*\*)

|   |   |           |           |           |
|---|---|-----------|-----------|-----------|
| C | 0 | -0.176472 | -3.578395 | -0.452849 |
| O | 0 | -0.176472 | -2.402234 | -0.452849 |
| O | 0 | -0.178614 | -4.739907 | -0.452849 |
| C | 0 | 0.456489  | 4.154869  | -0.156557 |
| N | 0 | 0.914629  | 2.787049  | 0.135011  |
| C | 0 | 2.338519  | 2.662085  | 0.476315  |
| C | 0 | -1.871747 | 2.560600  | 0.979667  |
| N | 0 | -1.182973 | 1.737863  | -0.027267 |
| C | 0 | -2.031821 | 0.763423  | -0.728133 |
| C | 0 | 0.159733  | 1.701679  | -0.132096 |
| N | 0 | 0.761705  | 0.558311  | -0.511393 |
| H | 0 | -0.491233 | 4.132534  | -0.691893 |
| H | 0 | 1.200862  | 4.640763  | -0.794547 |
| H | 0 | 0.346800  | 4.739907  | 0.761298  |
| H | 0 | 2.523439  | 1.722940  | 0.999352  |
| H | 0 | 2.603122  | 3.483303  | 1.146004  |
| H | 0 | 2.976711  | 2.726952  | -0.413790 |
| H | 0 | -1.151017 | 3.018153  | 1.655220  |
| H | 0 | -2.529674 | 1.911698  | 1.565526  |
| H | 0 | -2.478428 | 3.338794  | 0.507121  |
| H | 0 | -1.555811 | 0.442342  | -1.655220 |
| H | 0 | -2.976711 | 1.251380  | -0.977114 |
| H | 0 | -2.245792 | -0.109752 | -0.100906 |
| H | 0 | 0.306765  | -0.342132 | -0.432353 |
| H | 0 | 1.695427  | 0.569388  | -0.892991 |

HF= -551.6299471

**6) TMG-2CO2(B3LYP/6-31++G\*\*)**

|     |           |           |           |
|-----|-----------|-----------|-----------|
| C 0 | -1.527023 | -3.543613 | 0.056536  |
| O 0 | -1.527023 | -2.367724 | 0.056536  |
| O 0 | -1.528642 | -4.705510 | 0.056536  |
| C 0 | -0.911619 | 4.147503  | 0.758733  |
| N 0 | -0.433509 | 2.770409  | 0.952643  |
| C 0 | 0.971831  | 2.646299  | 1.363248  |
| C 0 | -3.250298 | 2.406347  | 1.628839  |
| N 0 | -2.492484 | 1.699066  | 0.585740  |
| C 0 | -3.280363 | 0.781878  | -0.249115 |
| C 0 | -1.143815 | 1.696410  | 0.549890  |
| N 0 | -0.496641 | 0.604826  | 0.105101  |
| H 0 | -1.830132 | 4.153012  | 0.174150  |
| H 0 | -0.148956 | 4.705510  | 0.206877  |
| H 0 | -1.083954 | 4.646117  | 1.717348  |
| H 0 | 1.153642  | 1.662299  | 1.796525  |
| H 0 | 1.172961  | 3.401919  | 2.126055  |
| H 0 | 1.655003  | 2.810115  | 0.521855  |
| H 0 | -2.575589 | 2.811961  | 2.380953  |
| H 0 | -3.919961 | 1.691456  | 2.116749  |
| H 0 | -3.852624 | 3.214247  | 1.202506  |
| H 0 | -2.746861 | 0.559567  | -1.173777 |
| H 0 | -4.221589 | 1.274507  | -0.503478 |
| H 0 | -3.507194 | -0.151639 | 0.278706  |
| H 0 | -0.940875 | -0.304029 | 0.094675  |
| H 0 | 0.455251  | 0.657378  | -0.233434 |
| C 0 | 3.313004  | 0.065117  | -1.757325 |
| O 0 | 2.394355  | 0.439028  | -1.125666 |
| O 0 | 4.221589  | -0.303079 | -2.380953 |

HF= -740.2261939

**7)TMG-SO2(B3LYP/6-31++G\*\*)**

|     |           |           |           |
|-----|-----------|-----------|-----------|
| S 0 | 2.150813  | -3.463332 | 0.283372  |
| O 0 | 2.150813  | -1.986219 | 0.283372  |
| O 0 | 0.848050  | -4.122747 | 0.283372  |
| C 0 | -1.301905 | 3.462760  | -0.116564 |
| N 0 | -1.034480 | 2.065752  | -0.493078 |
| C 0 | -2.145478 | 1.372461  | -1.158638 |
| C 0 | 1.678077  | 3.134269  | -0.640978 |
| N 0 | 1.215056  | 2.009603  | 0.186042  |
| C 0 | 2.225495  | 1.433739  | 1.085581  |
| C 0 | 0.039661  | 1.388484  | -0.034724 |

Supplementary Material (ESI) for *PCCP*  
This journal is © The Owner Societies 2008

|     |           |           |           |
|-----|-----------|-----------|-----------|
| N 0 | -0.065354 | 0.069633  | 0.208560  |
| H 0 | -0.584459 | 3.799446  | 0.629933  |
| H 0 | -2.303996 | 3.519551  | 0.319449  |
| H 0 | -1.261655 | 4.122747  | -0.988243 |
| H 0 | -1.779750 | 0.497531  | -1.697694 |
| H 0 | -2.592082 | 2.057366  | -1.882791 |
| H 0 | -2.923776 | 1.073105  | -0.445386 |
| H 0 | 1.003003  | 3.293249  | -1.480323 |
| H 0 | 2.668100  | 2.888239  | -1.036606 |
| H 0 | 1.755389  | 4.053585  | -0.052765 |
| H 0 | 1.742659  | 0.867753  | 1.882791  |
| H 0 | 2.787139  | 2.255224  | 1.535599  |
| H 0 | 2.923776  | 0.784043  | 0.546257  |
| H 0 | 0.743908  | -0.544495 | 0.241574  |
| H 0 | -0.970291 | -0.356448 | 0.340690  |

HF= -911.645393

**8)TMGSO2-TS(B3LYP/6-31++G\*\*)**

|     |           |           |           |
|-----|-----------|-----------|-----------|
| S 0 | -1.819217 | -0.285749 | -3.024858 |
| O 0 | -1.819217 | 1.290241  | -3.024858 |
| O 0 | -3.177042 | -0.812121 | -3.024858 |
| H 0 | -1.305157 | 1.440715  | -2.106893 |
| C 0 | 2.456433  | 0.820816  | 0.281551  |
| N 0 | 1.312524  | 0.349080  | -0.514557 |
| C 0 | 1.556010  | 0.257466  | -1.956711 |
| C 0 | 0.749035  | -0.854697 | 2.070399  |
| N 0 | -0.140971 | 0.022916  | 1.293853  |
| C 0 | -1.396300 | 0.381370  | 1.968523  |
| C 0 | 0.054776  | 0.293493  | -0.020255 |
| N 0 | -0.989608 | 0.540724  | -0.857680 |
| H 0 | 2.116331  | 1.237222  | 1.228067  |
| H 0 | 2.957582  | 1.614127  | -0.280886 |
| H 0 | 3.177042  | 0.019135  | 0.469410  |
| H 0 | 0.910135  | -0.497067 | -2.404338 |
| H 0 | 2.590192  | -0.056021 | -2.109899 |
| H 0 | 1.407135  | 1.222869  | -2.455454 |
| H 0 | 1.454219  | -1.359832 | 1.412370  |
| H 0 | 0.132786  | -1.614127 | 2.561071  |
| H 0 | 1.295416  | -0.300852 | 2.839900  |
| H 0 | -1.806388 | 1.307312  | 1.561681  |
| H 0 | -1.178939 | 0.553046  | 3.024858  |
| H 0 | -2.139520 | -0.422860 | 1.899022  |

H 0 -1.867916 0.380583 -0.364593  
HF= -911.5652092

**9)TMGSO2(B3LYP /6-31++G\*\*)**

N 0 1.047052 -1.231750 -0.546915  
N 0 1.047052 1.120480 -0.546915  
C 0 0.242684 -2.465323 -0.546915  
C 0 2.479481 -1.422556 -0.829786  
C 0 0.999506 2.341410 0.278860  
C 0 1.650331 1.291337 -1.877310  
C 0 0.547214 -0.054377 -0.125775  
N 0 -0.493585 -0.044585 0.757964  
S 0 -2.037628 0.869836 0.458968  
O 0 -3.050251 -0.156052 0.759901  
O 0 -1.974774 1.918318 1.720397  
H 0 -0.820120 -2.234694 -0.622133  
H 0 0.526239 -3.057576 -1.420101  
H 0 0.432622 -3.063269 0.351976  
H 0 3.050251 -0.557293 -0.496822  
H 0 2.823534 -2.298846 -0.273033  
H 0 2.654819 -1.593617 -1.895921  
H 0 1.995260 2.793877 0.278131  
H 0 0.287787 3.063269 -0.132644  
H 0 0.717872 2.095758 1.300701  
H 0 1.227899 2.194363 -2.326403  
H 0 2.736246 1.410943 -1.814234  
H 0 1.409599 0.442029 -2.515327  
H 0 -0.684035 -0.910258 1.259777  
H 0 -2.397973 1.534877 2.515327  
HF= -911.6088834

**10)TMGCO2-TS(B3LYP /6-31++G\*\*)**

N 0 -0.049401 -1.154976 0.039392  
C 0 -0.049401 0.212836 0.039392  
N 0 0.867636 0.892299 0.767393  
N 0 -0.934605 0.890060 -0.721037  
C 0 0.592560 2.208514 1.368215  
C 0 2.102443 0.247717 1.235920  
C 0 -2.170421 0.269120 -1.211288  
C 0 -0.594809 2.169796 -1.368220  
H 0 0.550292 -1.503228 0.784998  
H 0 0.819486 2.148017 2.436830

Supplementary Material (ESI) for *PCCP*  
This journal is © The Owner Societies 2008

|     |           |           |           |
|-----|-----------|-----------|-----------|
| H 0 | 1.212788  | 2.992435  | 0.923655  |
| H 0 | -0.459430 | 2.465332  | 1.257418  |
| H 0 | 2.870336  | 1.017265  | 1.338203  |
| H 0 | 1.967146  | -0.230491 | 2.214351  |
| H 0 | 2.458555  | -0.482503 | 0.507355  |
| H 0 | -1.995724 | -0.334775 | -2.109457 |
| H 0 | -2.636341 | -0.332081 | -0.431159 |
| H 0 | -2.870336 | 1.066229  | -1.467195 |
| H 0 | -1.187210 | 2.995227  | -0.962943 |
| H 0 | 0.465319  | 2.386964  | -1.251873 |
| H 0 | -0.809752 | 2.077409  | -2.436830 |
| C 0 | -1.533051 | -2.554521 | 0.039392  |
| O 0 | -2.313652 | -2.596131 | 0.894447  |
| O 0 | -1.011481 | -2.995227 | -1.011361 |
| H 0 | -0.249480 | -2.207329 | -1.031565 |

HF= -551.5230164

**11)TMGCO2 (B3LYP /6-31++G\*\*)**

|     |           |           |           |
|-----|-----------|-----------|-----------|
| N 0 | -0.026468 | -1.032177 | -0.067629 |
| C 0 | -0.026468 | 0.340059  | -0.067629 |
| C 0 | -1.111356 | -1.969586 | -0.067629 |
| N 0 | -0.990651 | 1.000139  | 0.602804  |
| N 0 | 0.949629  | 0.966527  | -0.738676 |
| C 0 | -1.472163 | 2.332198  | 0.196165  |
| C 0 | -1.575403 | 0.481739  | 1.859304  |
| C 0 | 1.668567  | 0.322079  | -1.854459 |
| C 0 | 1.501900  | 2.264671  | -0.310983 |
| O 0 | -0.899311 | -3.116684 | 0.201590  |
| O 0 | -2.319875 | -1.496384 | -0.402374 |
| H 0 | 0.870247  | -1.507451 | -0.053418 |
| H 0 | -2.564114 | 2.328545  | 0.255750  |
| H 0 | -1.094842 | 3.116684  | 0.858482  |
| H 0 | -1.178128 | 2.544585  | -0.831095 |
| H 0 | -1.022808 | -0.390229 | 2.206268  |
| H 0 | -1.503623 | 1.268001  | 2.615742  |
| H 0 | -2.626217 | 0.216165  | 1.719641  |
| H 0 | 2.626217  | -0.089006 | -1.517160 |
| H 0 | 1.061822  | -0.468039 | -2.295512 |
| H 0 | 1.865099  | 1.080487  | -2.615742 |
| H 0 | 1.226507  | 3.061956  | -1.006879 |
| H 0 | 1.159985  | 2.511726  | 0.692409  |
| H 0 | 2.591358  | 2.176472  | -0.292686 |

H 0 -2.307088 -0.585314 -0.731831  
HF= -551.5862245

**12) 1 (B3LYP/6-31++G\*\*)**

C 0 0.300101 -2.589997 0.021498  
C 0 -0.816343 -1.543638 0.021498  
O 0 -1.423105 -1.468849 1.310330  
C 0 -0.284118 -0.158119 -0.437975  
O 0 0.217921 -0.053611 -1.564498  
O 0 -0.443934 0.765355 0.451266  
H 0 0.738422 -2.674860 -0.977225  
H 0 -0.099615 -3.563617 0.327759  
H 0 1.085729 -2.303576 0.729535  
H 0 -1.582589 -1.838477 -0.711892  
H 0 -1.313845 -0.531817 1.564498  
S 0 0.300101 2.824169 0.021498  
O 0 -0.790053 3.563617 0.707610  
O 0 1.582589 2.785423 0.767276  
HF= -891.7378344

**13) 2 (B3LYP/6-31++G\*\*)**

C 0 1.543981 -1.231359 1.474209  
C 0 1.543981 0.298248 1.474209  
O 0 2.876249 0.801982 1.474209  
C 0 0.786670 0.877337 0.247121  
O 0 -0.443738 0.538460 0.165605  
O 0 1.439758 1.610308 -0.523728  
H 0 0.518452 -1.610308 1.506810  
H 0 2.098390 -1.605607 2.342534  
H 0 2.029830 -1.609922 0.567958  
H 0 1.024725 0.658809 2.375012  
H 0 2.896147 1.352841 0.662428  
S 0 -1.630375 1.233932 -1.576116  
O 0 -1.640517 -0.018279 -2.375012  
O 0 -2.896147 1.510147 -0.848371  
HF= -891.7399322

**14) 3 (B3LYP/6-31++G\*\*)**

C 0 -0.308820 -1.956835 -0.481587  
C 0 -0.308820 -0.433382 -0.481587  
O 0 1.038974 0.075696 -0.481587  
C 0 -0.986974 0.197753 -1.747606



Supplementary Material (ESI) for *PCCP*  
This journal is © The Owner Societies 2008

|   |   |           |           |           |
|---|---|-----------|-----------|-----------|
| O | 0 | -2.144027 | -0.158312 | -2.031774 |
| O | 0 | -0.220544 | 1.031451  | -2.334443 |
| H | 0 | -1.339613 | -2.318517 | -0.534866 |
| H | 0 | 0.163467  | -2.348963 | 0.426921  |
| H | 0 | 0.238917  | -2.337525 | -1.351076 |
| H | 0 | -0.826949 | -0.056983 | 0.412083  |
| H | 0 | 0.934870  | 0.732344  | -1.265146 |
| S | 0 | 1.860492  | 0.945226  | 1.500752  |
| O | 0 | 2.144027  | 2.348963  | 1.129605  |
| O | 0 | 0.656305  | 0.726580  | 2.334443  |

HF=-891.7268275

**15) 4 (B3LYP/6-31++G\*\*)**

|   |   |           |           |           |
|---|---|-----------|-----------|-----------|
| C | 0 | 1.559960  | -2.662831 | 1.854077  |
| C | 0 | 1.559960  | -1.132436 | 1.854077  |
| O | 0 | 2.892191  | -0.633390 | 1.854077  |
| C | 0 | 0.768809  | -0.571986 | 0.646102  |
| O | 0 | -0.455475 | -0.866829 | 0.590101  |
| O | 0 | 1.441961  | 0.132009  | -0.166287 |
| H | 0 | 0.535782  | -3.044311 | 1.890315  |
| H | 0 | 2.116271  | -3.030778 | 2.722991  |
| H | 0 | 2.046909  | -3.041958 | 0.949130  |
| H | 0 | 1.044968  | -0.772450 | 2.757176  |
| H | 0 | 2.942385  | -0.076465 | 1.053823  |
| S | 0 | -1.674658 | -0.996126 | -1.426162 |
| O | 0 | -1.683176 | -2.468939 | -1.552634 |
| O | 0 | -2.942385 | -0.391062 | -0.965659 |
| S | 0 | 0.559574  | 1.937538  | -1.472515 |
| O | 0 | 1.228654  | 1.650640  | -2.757176 |
| O | 0 | 1.139349  | 3.044311  | -0.684760 |

HF=-1440.3599072

**16) 5 (B3LYP/6-31++G\*\*)**

|   |   |           |           |           |
|---|---|-----------|-----------|-----------|
| C | 0 | 1.056853  | -2.289045 | 0.974337  |
| C | 0 | 1.056853  | -0.766935 | 0.974337  |
| O | 0 | 2.408140  | -0.278563 | 0.974337  |
| C | 0 | 0.309557  | -0.169149 | -0.250192 |
| O | 0 | -0.875902 | -0.529702 | -0.395750 |
| O | 0 | 1.005536  | 0.618746  | -0.949754 |
| H | 0 | 0.031212  | -2.660976 | 0.978430  |
| H | 0 | 1.574557  | -2.666729 | 1.860024  |
| H | 0 | 1.565622  | -2.672459 | 0.085575  |

|     |           |           |           |
|-----|-----------|-----------|-----------|
| H 0 | 0.555575  | -0.395228 | 1.875807  |
| H 0 | 2.438662  | 0.361857  | 0.230850  |
| S 0 | -2.497580 | -0.153543 | -2.163314 |
| O 0 | -3.502724 | -1.090172 | -1.641976 |
| O 0 | -2.808974 | 1.272844  | -1.991806 |
| S 0 | 3.401561  | 0.432434  | 3.106306  |
| O 0 | 3.502724  | 1.884999  | 2.936537  |
| O 0 | 2.308744  | -0.054344 | 3.956060  |
| S 0 | 0.595540  | 2.031197  | -2.902086 |
| O 0 | 1.916791  | 2.672459  | -2.883123 |
| O 0 | 0.392231  | 1.028127  | -3.956060 |

HF=-1989.2488071

**16) 6 (B3LYP/6-311+G\*)**

|     |           |           |           |
|-----|-----------|-----------|-----------|
| C 0 | 1.157769  | -4.062801 | -1.815497 |
| N 0 | 1.157769  | -2.599078 | -1.815497 |
| C 0 | 2.481967  | -1.978306 | -1.815497 |
| C 0 | -1.469357 | -2.972903 | -2.972636 |
| N 0 | -1.165672 | -2.327536 | -1.697336 |
| C 0 | -2.324896 | -1.907560 | -0.900507 |
| C 0 | 0.075118  | -1.891292 | -1.389917 |
| N 0 | 0.260094  | -0.767802 | -0.713306 |
| H 0 | 0.190903  | -4.444209 | -1.498309 |
| H 0 | 1.910591  | -4.425570 | -1.109340 |
| H 0 | 1.393325  | -4.458379 | -2.807601 |
| H 0 | 2.402604  | -0.927405 | -2.088287 |
| H 0 | 3.101806  | -2.485443 | -2.557036 |
| H 0 | 2.972801  | -2.056544 | -0.838904 |
| H 0 | -0.584157 | -3.011694 | -3.603269 |
| H 0 | -2.237003 | -2.392905 | -3.493580 |
| H 0 | -1.848957 | -3.988281 | -2.825759 |
| H 0 | -2.034570 | -1.778238 | 0.139254  |
| H 0 | -3.075146 | -2.698346 | -0.956631 |
| H 0 | -2.761273 | -0.977682 | -1.276418 |
| H 0 | -0.524117 | -0.171859 | -0.400987 |
| H 0 | 1.043874  | -0.715537 | -0.063979 |
| C 0 | -1.521436 | 3.604486  | 2.696903  |
| C 0 | -2.378102 | 2.488012  | 2.101285  |
| O 0 | -3.101806 | 2.964108  | 0.977079  |
| C 0 | -1.526669 | 1.261463  | 1.709530  |
| O 0 | -0.887445 | 0.721378  | 2.665878  |
| O 0 | -1.545918 | 0.913479  | 0.507475  |

Supplementary Material (ESI) for *PCCP*  
This journal is © The Owner Societies 2008

|     |           |           |          |
|-----|-----------|-----------|----------|
| H 0 | -1.016701 | 3.265286  | 3.603269 |
| H 0 | -2.157121 | 4.458379  | 2.941870 |
| H 0 | -0.768706 | 3.938335  | 1.977235 |
| H 0 | -3.095121 | 2.142872  | 2.857394 |
| H 0 | -2.828627 | 2.407226  | 0.229678 |
| S 0 | 0.304646  | -1.141108 | 2.699903 |
| O 0 | 1.474549  | -0.790471 | 1.851824 |
| O 0 | -0.601507 | -2.119505 | 2.062766 |

HF= -1255.1047111

**16) 7 (B3LYP/6-311+G\*)**

|     |           |           |           |
|-----|-----------|-----------|-----------|
| C 0 | -0.041679 | -3.786080 | -0.967149 |
| N 0 | -0.041679 | -2.325106 | -0.967149 |
| C 0 | 1.280080  | -1.684759 | -0.967149 |
| C 0 | -2.518142 | -2.696154 | -2.434023 |
| N 0 | -2.363833 | -2.057461 | -1.126599 |
| C 0 | -3.593804 | -1.520370 | -0.547327 |
| C 0 | -1.152934 | -1.605902 | -0.694571 |
| N 0 | -1.087111 | -0.488682 | 0.009795  |
| H 0 | -1.026131 | -4.170072 | -0.709577 |
| H 0 | 0.672940  | -4.144774 | -0.220280 |
| H 0 | 0.253778  | -4.185077 | -1.942054 |
| H 0 | 1.195072  | -0.656829 | -1.311998 |
| H 0 | 1.918591  | -2.234683 | -1.661187 |
| H 0 | 1.737621  | -1.694701 | 0.025622  |
| H 0 | -1.554767 | -2.791226 | -2.928053 |
| H 0 | -3.162821 | -2.078885 | -3.067124 |
| H 0 | -2.972116 | -3.686772 | -2.339402 |
| H 0 | -3.450182 | -1.316862 | 0.512428  |
| H 0 | -4.383082 | -2.266628 | -0.655271 |
| H 0 | -3.916729 | -0.599476 | -1.046274 |
| H 0 | -1.733989 | 0.268513  | -0.198635 |
| H 0 | -0.207709 | -0.143075 | 0.442438  |
| C 0 | 3.699649  | 1.808602  | 2.008613  |
| C 0 | 2.355106  | 2.530731  | 2.074025  |
| O 0 | 2.545800  | 3.923204  | 1.879841  |
| C 0 | 1.346242  | 1.939912  | 1.066278  |
| O 0 | 1.078174  | 0.727246  | 1.146923  |
| O 0 | 0.867338  | 2.789020  | 0.238744  |
| H 0 | 3.581333  | 0.746109  | 2.229448  |
| H 0 | 4.383082  | 2.248467  | 2.738591  |
| H 0 | 4.147499  | 1.919523  | 1.017164  |

Supplementary Material (ESI) for *PCCP*  
This journal is © The Owner Societies 2008

H 0 1.911984 2.370529 3.067124  
H 0 1.947884 4.185077 1.162491  
S 0 -0.423384 2.492038 -1.572680  
O 0 -1.725091 2.111013 -0.970592  
O 0 0.253794 1.378222 -2.264085  
HF=-1255.1037718

**16) 8 (B3LYP/6-311+G\*)**

C 0 0.114751 -3.390901 -2.012834  
N 0 0.114751 -1.925845 -2.012834  
C 0 1.442959 -1.304957 -2.012834  
C 0 -2.452593 -2.336744 -3.308599  
N 0 -2.211738 -1.648236 -2.043580  
C 0 -3.402194 -1.206850 -1.318063  
C 0 -0.981461 -1.211582 -1.676683  
N 0 -0.847537 -0.069140 -1.016816  
H 0 -0.849880 -3.770835 -1.687131  
H 0 0.868935 -3.739866 -1.304784  
H 0 0.347564 -3.785528 -3.006439  
H 0 1.357262 -0.242786 -2.232655  
H 0 2.041676 -1.779831 -2.793154  
H 0 1.945848 -1.437557 -1.052344  
H 0 -1.537850 -2.383958 -3.894404  
H 0 -3.199904 -1.782912 -3.885085  
H 0 -2.825728 -3.352530 -3.148093  
H 0 -3.153778 -1.011117 -0.276861  
H 0 -4.143584 -2.007597 -1.347880  
H 0 -3.846128 -0.308654 -1.762309  
H 0 -1.615467 0.584418 -0.924495  
H 0 -0.119889 0.046924 -0.293767  
C 0 3.468380 0.494091 2.578730  
C 0 2.072684 0.869273 3.085975  
O 0 2.129963 2.030004 3.894404  
C 0 1.096413 1.062341 1.911550  
O 0 0.815311 0.046303 1.199500  
O 0 0.666381 2.223461 1.725931  
H 0 3.451998 -0.448247 2.026937  
H 0 4.143584 0.390920 3.430751  
H 0 3.863045 1.279094 1.927927  
H 0 1.683129 0.048251 3.702371  
H 0 1.650912 2.724112 3.414039  
S 0 -1.101861 3.335670 0.417245

Supplementary Material (ESI) for *PCCP*  
This journal is © The Owner Societies 2008

O O -2.056533 2.245237 0.135019  
O O -0.310484 3.785528 -0.726475  
S O 0.558209 -2.245771 1.920940  
O O -0.747321 -2.416382 1.266908  
O O 1.699085 -2.824599 1.198954  
HF=-1803.7846963

**16) 9 (B3LYP/6-311+G\*)**

C O 0.753282 -3.072847 -3.477690  
N O 0.753282 -1.607212 -3.477690  
C O 2.085020 -0.995223 -3.477690  
C O -1.864881 -1.985257 -4.674119  
N O -1.572268 -1.327414 -3.401835  
C O -2.736284 -0.858695 -2.652679  
C O -0.323767 -0.896430 -3.080946  
N O -0.152739 0.233966 -2.408978  
H O -0.222057 -3.456258 -3.190423  
H O 1.479656 -3.421484 -2.741363  
H O 1.020064 -3.461963 -4.464309  
H O 2.007947 0.066445 -3.703697  
H O 2.681649 -1.478404 -4.253894  
H O 2.583593 -1.126995 -2.515126  
H O -0.966018 -2.052855 -5.281685  
H O -2.607276 -1.398013 -5.223626  
H O -2.266892 -2.990673 -4.520218  
H O -2.469142 -0.668995 -1.614395  
H O -3.498981 -1.639277 -2.669317  
H O -3.168639 0.050315 -3.087996  
H O -0.922448 0.862049 -2.227130  
H O 0.599572 0.350506 -1.701472  
C O 2.123744 2.540917 2.078185  
C O 0.767514 1.873157 1.868373  
O O -0.283918 2.732748 2.320182  
C O 0.502313 1.509193 0.398273  
O O 1.313005 0.693466 -0.160926  
O O -0.482104 2.033540 -0.156997  
H O 2.931623 1.872294 1.775088  
H O 2.252072 2.793421 3.132652  
H O 2.194585 3.461963 1.493962  
H O 0.714033 0.947106 2.455622  
H O -0.827495 2.900797 1.524026  
S O -1.722615 1.656757 4.099987

Supplementary Material (ESI) for *PCCP*  
This journal is © The Owner Societies 2008

O O -1.170733 0.318094 3.859731  
O O -1.239413 2.369258 5.281685  
S O 2.051329 -1.445389 0.679987  
O O 1.366576 -2.173395 -0.404186  
O O 3.498981 -1.298294 0.517174  
HF=-1803.7776655

**16) 10 (B3LYP /6-311+G\*)**

C O -0.533822 -3.953311 -2.579246  
N O -0.533822 -2.487785 -2.579246  
C O 0.794685 -1.871555 -2.579246  
C O -3.174037 -2.884202 -3.718271  
N O -2.857272 -2.214228 -2.459112  
C O -4.004498 -1.780062 -1.660703  
C O -1.608326 -1.780793 -2.164542  
N O -1.431374 -0.640351 -1.506996  
H O -1.500360 -4.335246 -2.264775  
H O 0.209023 -4.306979 -1.861556  
H O -0.289774 -4.342395 -3.571646  
H O 0.721180 -0.823827 -2.865622  
H O 1.412396 -2.392706 -3.312334  
H O 1.273257 -1.938629 -1.598025  
H O -2.295256 -2.928051 -4.357086  
H O -3.950512 -2.317881 -4.241455  
H O -3.543938 -3.899708 -3.550117  
H O -3.705142 -1.609037 -0.628608  
H O -4.751546 -2.575732 -1.672166  
H O -4.463268 -0.869188 -2.061535  
H O -2.210449 -0.023578 -1.303232  
H O -0.647026 -0.527489 -0.851649  
C O 2.719837 1.564352 0.279281  
C O 1.936273 1.251345 1.550459  
O O 1.852585 2.422548 2.364347  
C O 0.527478 0.703263 1.257176  
O O 0.444253 -0.342355 0.559581  
O O -0.427849 1.355603 1.762727  
H O 2.845070 0.664056 -0.324937  
H O 3.705749 1.947680 0.547730  
H O 2.205369 2.325634 -0.313174  
H O 2.459272 0.469486 2.115990  
H O 0.908469 2.575910 2.542750  
S O -2.762618 1.041284 1.509241

Supplementary Material (ESI) for *PCCP*  
This journal is © The Owner Societies 2008

|   |   |           |           |          |
|---|---|-----------|-----------|----------|
| O | O | -2.913296 | 1.273057  | 0.057112 |
| O | O | -2.940300 | -0.358158 | 1.917789 |
| S | O | 3.606073  | 2.915523  | 4.201125 |
| O | O | 4.751546  | 2.536175  | 3.373765 |
| O | O | 3.331373  | 4.342395  | 4.357086 |
| S | O | -0.422681 | -2.521829 | 1.714342 |
| O | O | -0.896401 | -3.126474 | 0.460522 |
| O | O | 0.846030  | -3.031381 | 2.231538 |

HF=-2352.4607469

**17) LAC-CO2 (B3LYP /6-31++G\*\*)**

|   |   |           |           |           |
|---|---|-----------|-----------|-----------|
| C | O | 1.561829  | -2.036697 | 0.350052  |
| C | O | 1.227661  | -0.792800 | 1.175766  |
| O | O | 2.389800  | 0.016418  | 1.355530  |
| C | O | 0.103210  | 0.060974  | 0.512177  |
| O | O | -1.006104 | -0.499710 | 0.321014  |
| O | O | 0.434280  | 1.251877  | 0.236877  |
| H | O | 0.670151  | -2.660202 | 0.232864  |
| H | O | 2.352692  | -2.620010 | 0.838272  |
| H | O | 1.918381  | -1.743942 | -0.644577 |
| H | O | 0.856262  | -1.109711 | 2.163330  |
| H | O | 2.083664  | 0.871246  | 0.972519  |
| C | O | -2.397812 | 1.352127  | -0.749069 |
| O | O | -2.836288 | 1.761169  | 0.259857  |
| O | O | -2.120911 | 1.076096  | -1.855698 |

**18) TMGLCO2-TS (B3LYP /6-31++G\*\*)**

|   |   |           |          |           |
|---|---|-----------|----------|-----------|
| N | O | -0.458160 | 0.847977 | -0.467270 |
| C | O | -0.458160 | 2.152115 | -0.467270 |
| N | O | 0.690735  | 2.935959 | -0.467270 |
| N | O | -1.648972 | 2.846039 | -0.477768 |
| C | O | 0.807922  | 4.085632 | 0.429657  |
| C | O | 1.965027  | 2.311172 | -0.804779 |
| C | O | -2.883865 | 2.177475 | -0.084641 |
| C | O | -1.835388 | 4.044403 | -1.289978 |
| H | O | 0.441925  | 0.438614 | -0.221359 |
| H | O | 1.418106  | 3.829544 | 1.308533  |
| H | O | 1.285553  | 4.927490 | -0.085098 |
| H | O | -0.176361 | 4.397095 | 0.776794  |
| H | O | 2.663528  | 3.093933 | -1.116440 |
| H | O | 2.409241  | 1.765457 | 0.040070  |
| H | O | 1.832794  | 1.615555 | -1.635483 |

Supplementary Material (ESI) for *PCCP*  
This journal is © The Owner Societies 2008

|     |           |           |           |
|-----|-----------|-----------|-----------|
| H 0 | -3.413055 | 1.755890  | -0.947800 |
| H 0 | -2.653976 | 1.371002  | 0.611389  |
| H 0 | -3.536728 | 2.907898  | 0.407349  |
| H 0 | -2.276886 | 4.854904  | -0.696365 |
| H 0 | -0.880737 | 4.379333  | -1.693726 |
| H 0 | -2.509644 | 3.826950  | -2.129623 |
| C 0 | -1.417221 | -0.404480 | -1.962189 |
| O 0 | -2.052002 | 0.365707  | -2.591202 |
| O 0 | -0.965240 | -1.463776 | -1.657822 |
| C 0 | 2.885193  | -4.297256 | 1.146057  |
| C 0 | 2.368332  | -2.997086 | 1.773041  |
| O 0 | 3.441925  | -2.233856 | 2.293045  |
| C 0 | 1.580322  | -2.156693 | 0.773895  |
| O 0 | 0.506683  | -2.774994 | 0.296265  |
| O 0 | 1.923386  | -1.022034 | 0.466248  |
| H 0 | 2.056259  | -4.927505 | 0.813110  |
| H 0 | 3.469330  | -4.840088 | 1.893677  |
| H 0 | 3.536728  | -4.079590 | 0.293961  |
| H 0 | 1.675690  | -3.245590 | 2.591217  |
| H 0 | 3.413803  | -1.368347 | 1.851807  |
| H 0 | 0.028320  | -2.206955 | -0.352127 |

HF= -894.8702248

**19) TMGLCO2 (B3LYP /6-31++G\*\*)**

|     |           |           |           |
|-----|-----------|-----------|-----------|
| N 0 | -0.479706 | 0.637527  | -0.785156 |
| C 0 | -0.479706 | 1.976974  | -0.785156 |
| N 0 | 0.707200  | 2.640488  | -0.785156 |
| N 0 | -1.630157 | 2.683990  | -0.749161 |
| C 0 | 0.902725  | 3.894669  | -0.058502 |
| C 0 | 1.930130  | 2.002502  | -1.283844 |
| C 0 | -2.871689 | 2.109436  | -0.225357 |
| C 0 | -1.801270 | 3.917358  | -1.518143 |
| C 0 | -1.385681 | -0.235779 | -1.596298 |
| O 0 | -2.146057 | 0.329132  | -2.376740 |
| O 0 | -1.197479 | -1.460983 | -1.359390 |
| H 0 | 0.329910  | 0.156525  | -0.367310 |
| H 0 | 1.742706  | 3.777542  | 0.635391  |
| H 0 | 1.129852  | 4.722992  | -0.739548 |
| H 0 | 0.009720  | 4.138672  | 0.516296  |
| H 0 | 2.556854  | 2.772369  | -1.743393 |
| H 0 | 2.490204  | 1.514800  | -0.478546 |
| H 0 | 1.678986  | 1.257095  | -2.038345 |



Supplementary Material (ESI) for *PCCP*  
This journal is © The Owner Societies 2008

|     |           |           |           |
|-----|-----------|-----------|-----------|
| H 0 | -3.492508 | 1.722488  | -1.037521 |
| H 0 | -2.639740 | 1.293991  | 0.459641  |
| H 0 | -3.403412 | 2.894882  | 0.321823  |
| H 0 | -2.060608 | 4.758728  | -0.865585 |
| H 0 | -0.890823 | 4.152390  | -2.067688 |
| H 0 | -2.610748 | 3.767258  | -2.240723 |
| C 0 | 2.833542  | -4.098877 | 0.791733  |
| C 0 | 2.251740  | -2.901245 | 1.549576  |
| O 0 | 3.292236  | -2.096085 | 2.080200  |
| C 0 | 1.337250  | -2.057053 | 0.663055  |
| O 0 | 0.313354  | -2.691147 | 0.176880  |
| O 0 | 1.598938  | -0.857285 | 0.467117  |
| H 0 | 2.036713  | -4.758743 | 0.439041  |
| H 0 | 3.492523  | -4.657547 | 1.461807  |
| H 0 | 3.423996  | -3.759460 | -0.065323 |
| H 0 | 1.627640  | -3.271530 | 2.376755  |
| H 0 | 3.147842  | -1.200226 | 1.731857  |
| H 0 | -0.304749 | -2.102753 | -0.457138 |

HF= -894.885066

**20) TMGL-2SCO2 (B3LYP/6-311+G\*)**

|     |           |           |           |
|-----|-----------|-----------|-----------|
| C 0 | 0.378616  | -3.698242 | -0.271835 |
| N 0 | 0.390167  | -2.354187 | 0.296524  |
| C 0 | 1.716782  | -1.757721 | 0.471252  |
| C 0 | -2.171066 | -2.138657 | -1.079376 |
| N 0 | -1.934067 | -2.120605 | 0.365555  |
| C 0 | -3.134766 | -1.902206 | 1.170364  |
| C 0 | -0.710266 | -1.809143 | 0.869370  |
| N 0 | -0.601898 | -1.015289 | 1.920303  |
| H 0 | -0.596008 | -4.161377 | -0.137833 |
| H 0 | 1.127518  | -4.311676 | 0.238815  |
| H 0 | 0.621170  | -3.682648 | -1.339157 |
| H 0 | 1.635132  | -0.690125 | 0.662094  |
| H 0 | 2.281509  | -1.908813 | -0.452408 |
| H 0 | 2.257278  | -2.221619 | 1.300003  |
| H 0 | -1.230988 | -2.088760 | -1.621948 |
| H 0 | -2.766327 | -1.264542 | -1.355316 |
| H 0 | -2.704132 | -3.048508 | -1.369888 |
| H 0 | -2.921677 | -2.091049 | 2.221130  |
| H 0 | -3.902100 | -2.605484 | 0.838882  |
| H 0 | -3.510010 | -0.883209 | 1.052139  |
| H 0 | -1.318359 | -0.315384 | 2.120743  |

Supplementary Material (ESI) for *PCCP*  
This journal is © The Owner Societies 2008

|     |           |           |           |
|-----|-----------|-----------|-----------|
| H 0 | 0.256683  | -0.971619 | 2.486694  |
| C 0 | 3.890121  | -2.509857 | 4.830658  |
| C 0 | 3.379364  | -1.133774 | 5.245422  |
| O 0 | 4.470490  | -0.332932 | 5.672134  |
| C 0 | 2.564224  | -0.458328 | 4.121109  |
| O 0 | 1.625946  | -1.081512 | 3.607849  |
| O 0 | 2.953323  | 0.733887  | 3.840118  |
| H 0 | 3.060043  | -3.166107 | 4.563446  |
| H 0 | 4.443039  | -2.958374 | 5.659210  |
| H 0 | 4.569931  | -2.426010 | 3.978043  |
| H 0 | 2.673508  | -1.252670 | 6.081360  |
| H 0 | 4.357712  | 0.534882  | 5.255417  |
| S 0 | 1.885605  | 2.168732  | 2.605820  |
| O 0 | 0.548157  | 2.170502  | 3.244446  |
| O 0 | 1.911453  | 1.537567  | 1.266174  |
| C 0 | 0.638351  | 3.564255  | -4.878494 |
| N 0 | 0.317871  | 2.618332  | -3.811722 |
| C 0 | -1.110825 | 2.500061  | -3.548065 |
| C 0 | 2.959091  | 1.483002  | -4.139740 |
| N 0 | 2.533234  | 2.380722  | -3.068237 |
| C 0 | 3.508240  | 2.521286  | -1.995500 |
| C 0 | 1.181808  | 2.470367  | -2.736252 |
| N 0 | 0.720123  | 2.431259  | -1.530746 |
| H 0 | 1.712280  | 3.712662  | -4.953583 |
| H 0 | 0.171555  | 4.540878  | -4.688766 |
| H 0 | 0.266251  | 3.191055  | -5.836884 |
| H 0 | -1.300568 | 1.691452  | -2.845581 |
| H 0 | -1.622253 | 2.286789  | -4.490250 |
| H 0 | -1.532440 | 3.423294  | -3.128357 |
| H 0 | 2.144836  | 1.311264  | -4.838974 |
| H 0 | 3.275131  | 0.510162  | -3.736740 |
| H 0 | 3.804871  | 1.914200  | -4.683304 |
| H 0 | 3.240097  | 3.356155  | -1.348755 |
| H 0 | 4.484772  | 2.731110  | -2.437271 |
| H 0 | 3.600922  | 1.618774  | -1.375717 |
| H 0 | 1.392715  | 2.127441  | -0.831116 |
| C 0 | -4.149400 | 2.186050  | 1.867798  |
| C 0 | -2.638306 | 2.333740  | 1.863113  |
| O 0 | -2.075867 | 1.362732  | 2.756042  |
| C 0 | -2.033600 | 2.099304  | 0.467529  |
| O 0 | -1.249893 | 3.087296  | 0.082657  |
| O 0 | -2.235809 | 1.076874  | -0.167145 |

|     |           |          |           |
|-----|-----------|----------|-----------|
| H 0 | -4.613861 | 2.931274 | 1.215836  |
| H 0 | -4.530823 | 2.323364 | 2.881516  |
| H 0 | -4.443176 | 1.195786 | 1.514755  |
| H 0 | -2.353668 | 3.335785 | 2.194611  |
| H 0 | -1.190369 | 1.671936 | 3.030930  |
| H 0 | -0.625549 | 2.827850 | -0.689835 |

**Table S1** The thermochemical parameters for the interaction between the LAC anion and the SO<sub>2</sub> (kJ mol<sup>-1</sup>)

| Complexes            | HF/6-31G*  |            | B3LYP/6-31G* |            | B3LYP/6-311+G* |            |
|----------------------|------------|------------|--------------|------------|----------------|------------|
|                      | $\Delta E$ | $\Delta H$ | $\Delta E$   | $\Delta H$ | $\Delta E$     | $\Delta H$ |
| 1                    | -89.32     | -91.80     | -99.14       | -101.62    | -87.15         | -89.63     |
| 2                    | -93.30     | -95.78     | -106.11      | -108.59    | -91.244        | -93.72     |
| 3                    | -46.32     | -48.80     | -74.026      | -76.50     | -59.34         | -61.81     |
| 4                    | -142.51    | -147.47    | -158.35      | -163.31    | -139.80        | -144.75    |
| 5                    | -173.87    | -181.30    | -199.28      | -206.71    | -175.45        | -182.9     |
| LAC-CO <sub>2</sub>  | -34.04     | -36.52     | -40.77       | -43.25     | -24.89         | -27.37     |
| TMG-SO <sub>2</sub>  | -28.93     | -31.41     | -33.21       | -35.69     | -27.32         | -29.79     |
| TMG-CO <sub>2</sub>  | -8.59      | -11.07     | -14.68       | -17.16     | -10.51         | -12.99     |
| TMG-2CO <sub>2</sub> | -15.51     | -20.46     | -27.57       | -32.52     | -19.26         | -24.22     |
